# Supplementary material for: Mountain Building Triggered Late Cretaceous North American Megaherbivore Dinosaur Radiation
Source: PLoS One. 2012 Aug 2;7(8):e42135. doi: 10.1371/journal.pone.0042135 (PMC3410882; doi:10.1371/journal.pone.0042135)
Supplement: SymmeTREE Information S1 — Data output files from SymmeTREE analysis of ceratopsid and hadrosaurid phylogenies. (XLSX) [file pone.0042135.s001.xlsx]

## Sheet: Saurolophines
******* TREE #0 *******
**************************** GENERAL INFORMATION ****************************
Sat Oct 29 21:20:10 2011
Tree from file: Saurolophines_DIVA.nex
-------------------------------- SETTINGS --------------------------------
Numbers as:	taxon labels
Number of simulated trees:	100000
--------------------------------------------------------------------------
Number of taxa:	23
Tree:	(23,(22,(21,(20,(19,(((17,16),18),(15,((14,13),((((((1,2),3),((5,4),6)),7),8),(9,((11,10),12)))))))))))
Node:	0	1	2	3	4	5	6	7	8	9	10	11	12	13	14	15	16	17	18	19	20	21	22	23	24	25	26	27	28	29	30	31	32	33	34	35	36	37	38	39	40	41	42	43	44
Paup#:	1	2	3	4	5	6	7	31	8	30	9	10	11	34	12	13	40	14	39	15	16	42	17	41	38	18	37	19	36	20	21	22	45	23	44	43	35	33	32	29	28	27	26	25	24
Dy:	1	1	1	1	1	1	1	2	1	3	1	1	1	2	1	1	2	1	3	1	1	2	1	3	6	1	7	1	8	1	1	1	2	1	3	4	12	14	15	18	19	20	21	22	23
ND:	1	2	3	4	5	8	8	7	7	6	7	9	9	8	14	14	13	13	12	14	14	13	13	12	11	11	10	10	9	10	12	12	11	11	10	9	8	7	6	5	4	3	2	1	0
TL:	0	0	0	0	0	0	0	0	0	0	0	0	0	0	0	0	0	0	0	0	0	0	0	0	0	0	0	0	0	0	0	0	0	0	0	0	0	0	0	0	0	0	0	0	0
RR?:	-	-	-	-	-	-	-	-	-	-	-	-	-	-	-	-	-	-	-	-	-	-	-	-	-	-	-	-	-	-	-	-	-	-	-	-	-	-	-	-	-	-	-	-	-
Delta1:	0	0	0	0	0	0	0	0	0	0	0	0	0	0	0	0	0	0	0	0	0	0	0	0	0	0	0	0	0	0	0	0	0	0	0	0	-1.75367	0.978499	1.46832	-1.72827	1.97958	0.0540672	0.0512933	0.0487902	0.04652
P_Delta1:	1	1	1	1	1	1	1	1	1	1	1	1	1	1	1	1	1	1	1	1	1	1	1	1	1	1	1	1	1	1	1	1	1	1	1	1	1	0.198135	0.120879	0.876523	0.0849673	0.470503	0.457127	0.457402	0.461957
Delta2:	0	0	0	0	0	0	0	0	0	0	0	0	0	0	0	0	0	0	0	0	0	0	0	0	0	0	0	0	0	0	0	0	0	0	0	0	0.0213601	0.796828	1.38629	0.207366	1.79176	0.693147	0.693147	0.693147	0.693147
P_Delta2:	1	1	1	1	1	1	1	1	1	1	1	1	1	1	1	1	1	1	1	1	1	1	1	1	1	1	1	1	1	1	1	1	1	1	1	1	0.589466	0.226107	0.120879	0.423012	0.0980392	0.23839	0.230719	0.228938	0.246039
SGPr:	1	1	1	1	1	1	1	1	1	1	1	1	1	1	1	1	1	1	1	1	1	1	1	1	1	1	1	1	1	1	1	1	1	1	1	1	0.727273	0.307692	0.142857	0.352941	0.111111	0.105263	0.1	0.0952381	0.0909091
P_dSGP:	1	1	1	1	1	1	1	1	1	1	1	1	1	1	1	1	1	1	1	1	1	1	1	1	1	1	1	1	1	1	1	1	1	1	1	1	0.90303	0.14965	0.363836	0.706767	0.28497	0.525732	0.529784	0.512572	0.513911
RR?: * Denotes nodes for which random resolutions were performed due to a polytomy at the first nested node in the larger descendant
	** Denotes nodes for which random resolutions were performed due to a polytomy at that node.
************************** end general information **************************
************* WHOLE-TREE TESTS OF DIVERSIFICATION RATE VARIATION *************
stat:	Mr	Ic/PrIc	sumlnP*/Mp*	PNP/Mp	sumP*/Ms*	SNP/Ms	B1/PrB1
Min ERM	1.48081e-05	139	-1.21396	2.53897e-08	0.42113	13.1089	8.26347
Max ERM	1	10	0	1	1	22	15.25
Observed	2.42343e-06	151	-1.28052	7.2542e-09	0.423724	13.319	9.01347
--> TailPr		0	0	0	1e-05	2e-05	0.00041
*********** end whole-tree tests of diversification rate variation ***********
******************* SHIFT STATISTICS FOR INDIVIDUAL NODES *******************
***************** end shift statistics for individual nodes *****************
******* TREE #1 *******
**************************** GENERAL INFORMATION ****************************
Sat Oct 29 21:20:10 2011
Tree from file: Saurolophines_DIVA.nex
-------------------------------- SETTINGS --------------------------------
Numbers as:	taxon labels
Number of simulated trees:	100000
--------------------------------------------------------------------------
Number of taxa:	23
Tree:	(23,(22,(21,(20,(19,(((17,16),18),(15,((14,13),((((((1,2),3),((5,4),6)),7),8),(9,((11,10),12)))))))))))
Node:	0	1	2	3	4	5	6	7	8	9	10	11	12	13	14	15	16	17	18	19	20	21	22	23	24	25	26	27	28	29	30	31	32	33	34	35	36	37	38	39	40	41	42	43	44
Paup#:	1	2	3	4	5	6	7	31	8	30	9	10	11	34	12	13	40	14	39	15	16	42	17	41	38	18	37	19	36	20	21	22	45	23	44	43	35	33	32	29	28	27	26	25	24
Dy:	1	1	1	1	1	1	1	2	1	3	1	1	1	2	1	1	2	1	3	1	1	2	1	3	6	1	7	1	8	1	1	1	2	1	3	4	12	14	15	18	19	20	21	22	23
ND:	1	2	3	4	5	8	8	7	7	6	7	9	9	8	14	14	13	13	12	14	14	13	13	12	11	11	10	10	9	10	12	12	11	11	10	9	8	7	6	5	4	3	2	1	0
TL:	0	0	0	0	0	0	0	0	0	0	0	0	0	0	0	0	0	0	0	0	0	0	0	0	0	0	0	0	0	0	0	0	0	0	0	0	0	0	0	0	0	0	0	0	0
RR?:	-	-	-	-	-	-	-	-	-	-	-	-	-	-	-	-	-	-	-	-	-	-	-	-	-	-	-	-	-	-	-	-	-	-	-	-	-	-	-	-	-	-	-	-	-
Delta1:	0	0	0	0	0	0	0	0	0	0	0	0	0	0	0	0	0	0	0	0	0	0	0	0	0	0	0	0	0	0	0	0	0	0	0	0	-1.75367	0.978499	1.46832	-1.72827	1.97958	0.0540672	0.0512933	0.0487902	0.04652
P_Delta1:	1	1	1	1	1	1	1	1	1	1	1	1	1	1	1	1	1	1	1	1	1	1	1	1	1	1	1	1	1	1	1	1	1	1	1	1	1	0.198135	0.120879	0.876523	0.0849673	0.470503	0.457127	0.457402	0.461957
Delta2:	0	0	0	0	0	0	0	0	0	0	0	0	0	0	0	0	0	0	0	0	0	0	0	0	0	0	0	0	0	0	0	0	0	0	0	0	0.0213601	0.796828	1.38629	0.207366	1.79176	0.693147	0.693147	0.693147	0.693147
P_Delta2:	1	1	1	1	1	1	1	1	1	1	1	1	1	1	1	1	1	1	1	1	1	1	1	1	1	1	1	1	1	1	1	1	1	1	1	1	0.589466	0.226107	0.120879	0.423012	0.0980392	0.23839	0.230719	0.228938	0.246039
SGPr:	1	1	1	1	1	1	1	1	1	1	1	1	1	1	1	1	1	1	1	1	1	1	1	1	1	1	1	1	1	1	1	1	1	1	1	1	0.727273	0.307692	0.142857	0.352941	0.111111	0.105263	0.1	0.0952381	0.0909091
P_dSGP:	1	1	1	1	1	1	1	1	1	1	1	1	1	1	1	1	1	1	1	1	1	1	1	1	1	1	1	1	1	1	1	1	1	1	1	1	0.90303	0.14965	0.363836	0.706767	0.28497	0.525732	0.529784	0.512572	0.513911
RR?: * Denotes nodes for which random resolutions were performed due to a polytomy at the first nested node in the larger descendant
	** Denotes nodes for which random resolutions were performed due to a polytomy at that node.
************************** end general information **************************
************* WHOLE-TREE TESTS OF DIVERSIFICATION RATE VARIATION *************
stat:	Mr	Ic/PrIc	sumlnP*/Mp*	PNP/Mp	sumP*/Ms*	SNP/Ms	B1/PrB1
Min ERM	1.48081e-05	139	-1.21396	2.53897e-08	0.42113	13.1089	8.26347
Max ERM	1	10	0	1	1	22	15.25
Observed	2.42343e-06	151	-1.28052	7.2542e-09	0.423724	13.319	9.01347
--> TailPr		0	0	0	1e-05	2e-05	0.00041
*********** end whole-tree tests of diversification rate variation ***********
******************* SHIFT STATISTICS FOR INDIVIDUAL NODES *******************
***************** end shift statistics for individual nodes *****************
******* TREE #2 *******
**************************** GENERAL INFORMATION ****************************
Sat Oct 29 21:20:10 2011
Tree from file: Saurolophines_DIVA.nex
-------------------------------- SETTINGS --------------------------------
Numbers as:	taxon labels
Number of simulated trees:	100000
--------------------------------------------------------------------------
Number of taxa:	23
Tree:	(23,(22,(21,(20,(19,(((17,16),18),(15,((14,13),((((((1,2),3),((5,4),6)),7),8),(9,((11,10),12)))))))))))
Node:	0	1	2	3	4	5	6	7	8	9	10	11	12	13	14	15	16	17	18	19	20	21	22	23	24	25	26	27	28	29	30	31	32	33	34	35	36	37	38	39	40	41	42	43	44
Paup#:	1	2	3	4	5	6	7	31	8	30	9	10	11	34	12	13	40	14	39	15	16	42	17	41	38	18	37	19	36	20	21	22	45	23	44	43	35	33	32	29	28	27	26	25	24
Dy:	1	1	1	1	1	1	1	2	1	3	1	1	1	2	1	1	2	1	3	1	1	2	1	3	6	1	7	1	8	1	1	1	2	1	3	4	12	14	15	18	19	20	21	22	23
ND:	1	2	3	4	5	8	8	7	7	6	7	9	9	8	14	14	13	13	12	14	14	13	13	12	11	11	10	10	9	10	12	12	11	11	10	9	8	7	6	5	4	3	2	1	0
TL:	0	0	0	0	0	0	0	0	0	0	0	0	0	0	0	0	0	0	0	0	0	0	0	0	0	0	0	0	0	0	0	0	0	0	0	0	0	0	0	0	0	0	0	0	0
RR?:	-	-	-	-	-	-	-	-	-	-	-	-	-	-	-	-	-	-	-	-	-	-	-	-	-	-	-	-	-	-	-	-	-	-	-	-	-	-	-	-	-	-	-	-	-
Delta1:	0	0	0	0	0	0	0	0	0	0	0	0	0	0	0	0	0	0	0	0	0	0	0	0	0	0	0	0	0	0	0	0	0	0	0	0	-1.75367	0.978499	1.46832	-1.72827	1.97958	0.0540672	0.0512933	0.0487902	0.04652
P_Delta1:	1	1	1	1	1	1	1	1	1	1	1	1	1	1	1	1	1	1	1	1	1	1	1	1	1	1	1	1	1	1	1	1	1	1	1	1	1	0.198135	0.120879	0.876523	0.0849673	0.470503	0.457127	0.457402	0.461957
Delta2:	0	0	0	0	0	0	0	0	0	0	0	0	0	0	0	0	0	0	0	0	0	0	0	0	0	0	0	0	0	0	0	0	0	0	0	0	0.0213601	0.796828	1.38629	0.207366	1.79176	0.693147	0.693147	0.693147	0.693147
P_Delta2:	1	1	1	1	1	1	1	1	1	1	1	1	1	1	1	1	1	1	1	1	1	1	1	1	1	1	1	1	1	1	1	1	1	1	1	1	0.589466	0.226107	0.120879	0.423012	0.0980392	0.23839	0.230719	0.228938	0.246039
SGPr:	1	1	1	1	1	1	1	1	1	1	1	1	1	1	1	1	1	1	1	1	1	1	1	1	1	1	1	1	1	1	1	1	1	1	1	1	0.727273	0.307692	0.142857	0.352941	0.111111	0.105263	0.1	0.0952381	0.0909091
P_dSGP:	1	1	1	1	1	1	1	1	1	1	1	1	1	1	1	1	1	1	1	1	1	1	1	1	1	1	1	1	1	1	1	1	1	1	1	1	0.90303	0.14965	0.363836	0.706767	0.28497	0.525732	0.529784	0.512572	0.513911
RR?: * Denotes nodes for which random resolutions were performed due to a polytomy at the first nested node in the larger descendant
	** Denotes nodes for which random resolutions were performed due to a polytomy at that node.
************************** end general information **************************
************* WHOLE-TREE TESTS OF DIVERSIFICATION RATE VARIATION *************
stat:	Mr	Ic/PrIc	sumlnP*/Mp*	PNP/Mp	sumP*/Ms*	SNP/Ms	B1/PrB1
Min ERM	1.48081e-05	139	-1.21396	2.53897e-08	0.42113	13.1089	8.26347
Max ERM	1	10	0	1	1	22	15.25
Observed	2.42343e-06	151	-1.28052	7.2542e-09	0.423724	13.319	9.01347
--> TailPr		0	0	0	1e-05	2e-05	0.00041
*********** end whole-tree tests of diversification rate variation ***********
******************* SHIFT STATISTICS FOR INDIVIDUAL NODES *******************
***************** end shift statistics for individual nodes *****************
******* TREE #3 *******
**************************** GENERAL INFORMATION ****************************
Sat Oct 29 21:20:11 2011
Tree from file: Saurolophines_DIVA.nex
-------------------------------- SETTINGS --------------------------------
Numbers as:	taxon labels
Number of simulated trees:	100000
--------------------------------------------------------------------------
Number of taxa:	23
Tree:	(23,(22,(21,(20,(19,(((17,16),18),(15,((14,13),((((((1,2),3),((5,4),6)),7),8),(9,((11,10),12)))))))))))
Node:	0	1	2	3	4	5	6	7	8	9	10	11	12	13	14	15	16	17	18	19	20	21	22	23	24	25	26	27	28	29	30	31	32	33	34	35	36	37	38	39	40	41	42	43	44
Paup#:	1	2	3	4	5	6	7	31	8	30	9	10	11	34	12	13	40	14	39	15	16	42	17	41	38	18	37	19	36	20	21	22	45	23	44	43	35	33	32	29	28	27	26	25	24
Dy:	1	1	1	1	1	1	1	2	1	3	1	1	1	2	1	1	2	1	3	1	1	2	1	3	6	1	7	1	8	1	1	1	2	1	3	4	12	14	15	18	19	20	21	22	23
ND:	1	2	3	4	5	8	8	7	7	6	7	9	9	8	14	14	13	13	12	14	14	13	13	12	11	11	10	10	9	10	12	12	11	11	10	9	8	7	6	5	4	3	2	1	0
TL:	0	0	0	0	0	0	0	0	0	0	0	0	0	0	0	0	0	0	0	0	0	0	0	0	0	0	0	0	0	0	0	0	0	0	0	0	0	0	0	0	0	0	0	0	0
RR?:	-	-	-	-	-	-	-	-	-	-	-	-	-	-	-	-	-	-	-	-	-	-	-	-	-	-	-	-	-	-	-	-	-	-	-	-	-	-	-	-	-	-	-	-	-
Delta1:	0	0	0	0	0	0	0	0	0	0	0	0	0	0	0	0	0	0	0	0	0	0	0	0	0	0	0	0	0	0	0	0	0	0	0	0	-1.75367	0.978499	1.46832	-1.72827	1.97958	0.0540672	0.0512933	0.0487902	0.04652
P_Delta1:	1	1	1	1	1	1	1	1	1	1	1	1	1	1	1	1	1	1	1	1	1	1	1	1	1	1	1	1	1	1	1	1	1	1	1	1	1	0.198135	0.120879	0.876523	0.0849673	0.470503	0.457127	0.457402	0.461957
Delta2:	0	0	0	0	0	0	0	0	0	0	0	0	0	0	0	0	0	0	0	0	0	0	0	0	0	0	0	0	0	0	0	0	0	0	0	0	0.0213601	0.796828	1.38629	0.207366	1.79176	0.693147	0.693147	0.693147	0.693147
P_Delta2:	1	1	1	1	1	1	1	1	1	1	1	1	1	1	1	1	1	1	1	1	1	1	1	1	1	1	1	1	1	1	1	1	1	1	1	1	0.589466	0.226107	0.120879	0.423012	0.0980392	0.23839	0.230719	0.228938	0.246039
SGPr:	1	1	1	1	1	1	1	1	1	1	1	1	1	1	1	1	1	1	1	1	1	1	1	1	1	1	1	1	1	1	1	1	1	1	1	1	0.727273	0.307692	0.142857	0.352941	0.111111	0.105263	0.1	0.0952381	0.0909091
P_dSGP:	1	1	1	1	1	1	1	1	1	1	1	1	1	1	1	1	1	1	1	1	1	1	1	1	1	1	1	1	1	1	1	1	1	1	1	1	0.90303	0.14965	0.363836	0.706767	0.28497	0.525732	0.529784	0.512572	0.513911
RR?: * Denotes nodes for which random resolutions were performed due to a polytomy at the first nested node in the larger descendant
	** Denotes nodes for which random resolutions were performed due to a polytomy at that node.
************************** end general information **************************
************* WHOLE-TREE TESTS OF DIVERSIFICATION RATE VARIATION *************
stat:	Mr	Ic/PrIc	sumlnP*/Mp*	PNP/Mp	sumP*/Ms*	SNP/Ms	B1/PrB1
Min ERM	1.48081e-05	139	-1.21396	2.53897e-08	0.42113	13.1089	8.26347
Max ERM	1	10	0	1	1	22	15.25
Observed	2.42343e-06	151	-1.28052	7.2542e-09	0.423724	13.319	9.01347
--> TailPr		0	0	0	1e-05	2e-05	0.00041
*********** end whole-tree tests of diversification rate variation ***********
******************* SHIFT STATISTICS FOR INDIVIDUAL NODES *******************
***************** end shift statistics for individual nodes *****************
******* TREE #4 *******
**************************** GENERAL INFORMATION ****************************
Sat Oct 29 21:20:11 2011
Tree from file: Saurolophines_DIVA.nex
-------------------------------- SETTINGS --------------------------------
Numbers as:	taxon labels
Number of simulated trees:	100000
--------------------------------------------------------------------------
Number of taxa:	23
Tree:	(23,(22,(21,(20,(19,(((17,16),18),(15,((14,13),((((((1,2),3),((5,4),6)),7),8),(9,((11,10),12)))))))))))
Node:	0	1	2	3	4	5	6	7	8	9	10	11	12	13	14	15	16	17	18	19	20	21	22	23	24	25	26	27	28	29	30	31	32	33	34	35	36	37	38	39	40	41	42	43	44
Paup#:	1	2	3	4	5	6	7	31	8	30	9	10	11	34	12	13	40	14	39	15	16	42	17	41	38	18	37	19	36	20	21	22	45	23	44	43	35	33	32	29	28	27	26	25	24
Dy:	1	1	1	1	1	1	1	2	1	3	1	1	1	2	1	1	2	1	3	1	1	2	1	3	6	1	7	1	8	1	1	1	2	1	3	4	12	14	15	18	19	20	21	22	23
ND:	1	2	3	4	5	8	8	7	7	6	7	9	9	8	14	14	13	13	12	14	14	13	13	12	11	11	10	10	9	10	12	12	11	11	10	9	8	7	6	5	4	3	2	1	0
TL:	0	0	0	0	0	0	0	0	0	0	0	0	0	0	0	0	0	0	0	0	0	0	0	0	0	0	0	0	0	0	0	0	0	0	0	0	0	0	0	0	0	0	0	0	0
RR?:	-	-	-	-	-	-	-	-	-	-	-	-	-	-	-	-	-	-	-	-	-	-	-	-	-	-	-	-	-	-	-	-	-	-	-	-	-	-	-	-	-	-	-	-	-
Delta1:	0	0	0	0	0	0	0	0	0	0	0	0	0	0	0	0	0	0	0	0	0	0	0	0	0	0	0	0	0	0	0	0	0	0	0	0	-1.75367	0.978499	1.46832	-1.72827	1.97958	0.0540672	0.0512933	0.0487902	0.04652
P_Delta1:	1	1	1	1	1	1	1	1	1	1	1	1	1	1	1	1	1	1	1	1	1	1	1	1	1	1	1	1	1	1	1	1	1	1	1	1	1	0.198135	0.120879	0.876523	0.0849673	0.470503	0.457127	0.457402	0.461957
Delta2:	0	0	0	0	0	0	0	0	0	0	0	0	0	0	0	0	0	0	0	0	0	0	0	0	0	0	0	0	0	0	0	0	0	0	0	0	0.0213601	0.796828	1.38629	0.207366	1.79176	0.693147	0.693147	0.693147	0.693147
P_Delta2:	1	1	1	1	1	1	1	1	1	1	1	1	1	1	1	1	1	1	1	1	1	1	1	1	1	1	1	1	1	1	1	1	1	1	1	1	0.589466	0.226107	0.120879	0.423012	0.0980392	0.23839	0.230719	0.228938	0.246039
SGPr:	1	1	1	1	1	1	1	1	1	1	1	1	1	1	1	1	1	1	1	1	1	1	1	1	1	1	1	1	1	1	1	1	1	1	1	1	0.727273	0.307692	0.142857	0.352941	0.111111	0.105263	0.1	0.0952381	0.0909091
P_dSGP:	1	1	1	1	1	1	1	1	1	1	1	1	1	1	1	1	1	1	1	1	1	1	1	1	1	1	1	1	1	1	1	1	1	1	1	1	0.90303	0.14965	0.363836	0.706767	0.28497	0.525732	0.529784	0.512572	0.513911
RR?: * Denotes nodes for which random resolutions were performed due to a polytomy at the first nested node in the larger descendant
	** Denotes nodes for which random resolutions were performed due to a polytomy at that node.
************************** end general information **************************
************* WHOLE-TREE TESTS OF DIVERSIFICATION RATE VARIATION *************
stat:	Mr	Ic/PrIc	sumlnP*/Mp*	PNP/Mp	sumP*/Ms*	SNP/Ms	B1/PrB1
Min ERM	1.48081e-05	139	-1.21396	2.53897e-08	0.42113	13.1089	8.26347
Max ERM	1	10	0	1	1	22	15.25
Observed	2.42343e-06	151	-1.28052	7.2542e-09	0.423724	13.319	9.01347
--> TailPr		0	0	0	1e-05	2e-05	0.00041
*********** end whole-tree tests of diversification rate variation ***********
******************* SHIFT STATISTICS FOR INDIVIDUAL NODES *******************
***************** end shift statistics for individual nodes *****************
******* TREE #5 *******
**************************** GENERAL INFORMATION ****************************
Sat Oct 29 21:20:11 2011
Tree from file: Saurolophines_DIVA.nex
-------------------------------- SETTINGS --------------------------------
Numbers as:	taxon labels
Number of simulated trees:	100000
--------------------------------------------------------------------------
Number of taxa:	23
Tree:	(23,(22,(21,(20,(19,(((17,16),18),(15,((14,13),((((((1,2),3),((5,4),6)),7),8),(9,((11,10),12)))))))))))
Node:	0	1	2	3	4	5	6	7	8	9	10	11	12	13	14	15	16	17	18	19	20	21	22	23	24	25	26	27	28	29	30	31	32	33	34	35	36	37	38	39	40	41	42	43	44
Paup#:	1	2	3	4	5	6	7	31	8	30	9	10	11	34	12	13	40	14	39	15	16	42	17	41	38	18	37	19	36	20	21	22	45	23	44	43	35	33	32	29	28	27	26	25	24
Dy:	1	1	1	1	1	1	1	2	1	3	1	1	1	2	1	1	2	1	3	1	1	2	1	3	6	1	7	1	8	1	1	1	2	1	3	4	12	14	15	18	19	20	21	22	23
ND:	1	2	3	4	5	8	8	7	7	6	7	9	9	8	14	14	13	13	12	14	14	13	13	12	11	11	10	10	9	10	12	12	11	11	10	9	8	7	6	5	4	3	2	1	0
TL:	0	0	0	0	0	0	0	0	0	0	0	0	0	0	0	0	0	0	0	0	0	0	0	0	0	0	0	0	0	0	0	0	0	0	0	0	0	0	0	0	0	0	0	0	0
RR?:	-	-	-	-	-	-	-	-	-	-	-	-	-	-	-	-	-	-	-	-	-	-	-	-	-	-	-	-	-	-	-	-	-	-	-	-	-	-	-	-	-	-	-	-	-
Delta1:	0	0	0	0	0	0	0	0	0	0	0	0	0	0	0	0	0	0	0	0	0	0	0	0	0	0	0	0	0	0	0	0	0	0	0	0	-1.75367	0.978499	1.46832	-1.72827	1.97958	0.0540672	0.0512933	0.0487902	0.04652
P_Delta1:	1	1	1	1	1	1	1	1	1	1	1	1	1	1	1	1	1	1	1	1	1	1	1	1	1	1	1	1	1	1	1	1	1	1	1	1	1	0.198135	0.120879	0.876523	0.0849673	0.470503	0.457127	0.457402	0.461957
Delta2:	0	0	0	0	0	0	0	0	0	0	0	0	0	0	0	0	0	0	0	0	0	0	0	0	0	0	0	0	0	0	0	0	0	0	0	0	0.0213601	0.796828	1.38629	0.207366	1.79176	0.693147	0.693147	0.693147	0.693147
P_Delta2:	1	1	1	1	1	1	1	1	1	1	1	1	1	1	1	1	1	1	1	1	1	1	1	1	1	1	1	1	1	1	1	1	1	1	1	1	0.589466	0.226107	0.120879	0.423012	0.0980392	0.23839	0.230719	0.228938	0.246039
SGPr:	1	1	1	1	1	1	1	1	1	1	1	1	1	1	1	1	1	1	1	1	1	1	1	1	1	1	1	1	1	1	1	1	1	1	1	1	0.727273	0.307692	0.142857	0.352941	0.111111	0.105263	0.1	0.0952381	0.0909091
P_dSGP:	1	1	1	1	1	1	1	1	1	1	1	1	1	1	1	1	1	1	1	1	1	1	1	1	1	1	1	1	1	1	1	1	1	1	1	1	0.90303	0.14965	0.363836	0.706767	0.28497	0.525732	0.529784	0.512572	0.513911
RR?: * Denotes nodes for which random resolutions were performed due to a polytomy at the first nested node in the larger descendant
	** Denotes nodes for which random resolutions were performed due to a polytomy at that node.
************************** end general information **************************
************* WHOLE-TREE TESTS OF DIVERSIFICATION RATE VARIATION *************
stat:	Mr	Ic/PrIc	sumlnP*/Mp*	PNP/Mp	sumP*/Ms*	SNP/Ms	B1/PrB1
Min ERM	1.48081e-05	139	-1.21396	2.53897e-08	0.42113	13.1089	8.26347
Max ERM	1	10	0	1	1	22	15.25
Observed	2.42343e-06	151	-1.28052	7.2542e-09	0.423724	13.319	9.01347
--> TailPr		0	0	0	1e-05	2e-05	0.00041
*********** end whole-tree tests of diversification rate variation ***********
******************* SHIFT STATISTICS FOR INDIVIDUAL NODES *******************
***************** end shift statistics for individual nodes *****************
**************************** OUTPUT FOR WHOLE BATCH ****************************
-------------------------------- SETTINGS --------------------------------
Numbers as:	taxon labels
Number of simulated trees:	100000
--------------------------------------------------------------------------
Number of taxa:	23
stat:	Mr	Ic/PrIc	sumlnP*/Mp*	PNP/Mp	sumP*/Ms*	SNP/Ms	B1/PrB1
Min ERM	1.48081e-05	139	-1.21396	2.53897e-08	0.42113	13.1089	8.26347
Max ERM	1	10	0	1	1	22	15.25
Min sym	2.42343e-06	151	-1.28052	7.2542e-09	0.423724	13.319	9.01347
--> TailPr		0	0	0	1e-05	2e-05	0.00041
Max sym	2.42343e-06	151	-1.28052	7.2542e-09	0.423724	13.319	9.01347
--> TailPr		0	0	0	1e-05	2e-05	0.00041
********************************* END OF BATCH *********************************

## Sheet: Chasmosaurines
******* TREE #0 *******
**************************** GENERAL INFORMATION ****************************
Sat Oct 29 21:31:43 2011
Tree from file: Chasmosaurines_DIVA.nex
-------------------------------- SETTINGS --------------------------------
Numbers as:	taxon labels
Number of simulated trees:	100000
--------------------------------------------------------------------------
Number of taxa:	23
Tree:	(22,(23,(21,(20,(1,((2,3),(4,(5,((6,7),(8,((9,10),(11,(12,((14,13),((15,16),(17,(18,19)))))))))))))))))
Node:	0	1	2	3	4	5	6	7	8	9	10	11	12	13	14	15	16	17	18	19	20	21	22	23	24	25	26	27	28	29	30	31	32	33	34	35	36	37	38	39	40	41	42	43	44
Paup#:	1	2	3	4	5	6	7	30	8	9	10	11	34	12	13	14	37	15	16	17	18	41	19	20	43	21	22	23	45	44	42	40	39	38	36	35	33	32	31	29	28	27	26	25	24
Dy:	1	1	1	1	1	1	1	2	1	1	1	1	2	1	1	1	2	1	1	1	1	2	1	1	2	1	1	1	2	3	5	7	8	9	11	12	14	15	16	18	19	20	21	22	23
ND:	1	2	3	4	5	7	7	6	7	8	10	10	9	10	12	12	11	12	13	15	15	14	16	16	15	16	17	17	16	15	14	13	12	11	10	9	8	7	6	5	4	3	2	1	0
TL:	0	0	0	0	0	0	0	0	0	0	0	0	0	0	0	0	0	0	0	0	0	0	0	0	0	0	0	0	0	0	0	0	0	0	0	0	0	0	0	0	0	0	0	0	0
RR?:	-	-	-	-	-	-	-	-	-	-	-	-	-	-	-	-	-	-	-	-	-	-	-	-	-	-	-	-	-	-	-	-	-	-	-	-	-	-	-	-	-	-	-	-	-
Delta1:	0	0	0	0	0	0	0	0	0	0	0	0	0	0	0	0	0	0	0	0	0	0	0	0	0	0	0	0	0	0	0	0	0	0	-1.17572	1.49418	-1.22716	1.46832	0.0689929	-1.26556	1.44788	0.0540672	0.0512933	0.0487902	0.04652
P_Delta1:	1	1	1	1	1	1	1	1	1	1	1	1	1	1	1	1	1	1	1	1	1	1	1	1	1	1	1	1	1	1	1	1	1	1	0.79619	0.145455	0.826984	0.120879	0.463797	0.859716	0.125817	0.470503	0.457127	0.457402	0.461957
Delta2:	0	0	0	0	0	0	0	0	0	0	0	0	0	0	0	0	0	0	0	0	0	0	0	0	0	0	0	0	0	0	0	0	0	0	0.246564	1.38629	0.246564	1.38629	0.693147	0.246564	1.38629	0.693147	0.693147	0.693147	0.693147
P_Delta2:	1	1	1	1	1	1	1	1	1	1	1	1	1	1	1	1	1	1	1	1	1	1	1	1	1	1	1	1	1	1	1	1	1	1	0.378571	0.145455	0.389122	0.120879	0.247863	0.386598	0.111928	0.23839	0.230719	0.228938	0.246039
SGPr:	1	1	1	1	1	1	1	1	1	1	1	1	1	1	1	1	1	1	1	1	1	1	1	1	1	1	1	1	1	1	1	1	1	1	0.4	0.181818	0.307692	0.142857	0.133333	0.235294	0.111111	0.105263	0.1	0.0952381	0.0909091
P_dSGP:	1	1	1	1	1	1	1	1	1	1	1	1	1	1	1	1	1	1	1	1	1	1	1	1	1	1	1	1	1	1	1	1	1	1	0.71619	0.28153	0.656765	0.363836	0.551002	0.65047	0.421606	0.525732	0.529784	0.512572	0.513911
RR?: * Denotes nodes for which random resolutions were performed due to a polytomy at the first nested node in the larger descendant
	** Denotes nodes for which random resolutions were performed due to a polytomy at that node.
************************** end general information **************************
************* WHOLE-TREE TESTS OF DIVERSIFICATION RATE VARIATION *************
stat:	Mr	Ic/PrIc	sumlnP*/Mp*	PNP/Mp	sumP*/Ms*	SNP/Ms	B1/PrB1
Min ERM	3.08911e-07	155	-1.29924	3.81837e-09	0.421751	12.9823	8.11273
Max ERM	1	10	0	1	1	22	15
Observed	1.19496e-06	181	-1.49418	4.83614e-11	0.327958	11.1059	8.38073
--> TailPr		0	0	0	0	0	4e-05
*********** end whole-tree tests of diversification rate variation ***********
******************* SHIFT STATISTICS FOR INDIVIDUAL NODES *******************
***************** end shift statistics for individual nodes *****************
******* TREE #1 *******
**************************** GENERAL INFORMATION ****************************
Sat Oct 29 21:31:43 2011
Tree from file: Chasmosaurines_DIVA.nex
-------------------------------- SETTINGS --------------------------------
Numbers as:	taxon labels
Number of simulated trees:	100000
--------------------------------------------------------------------------
Number of taxa:	23
Tree:	(22,(23,(21,(20,(1,((2,3),(4,(5,((6,7),(8,((9,10),(11,(12,((14,13),((15,16),(17,(18,19)))))))))))))))))
Node:	0	1	2	3	4	5	6	7	8	9	10	11	12	13	14	15	16	17	18	19	20	21	22	23	24	25	26	27	28	29	30	31	32	33	34	35	36	37	38	39	40	41	42	43	44
Paup#:	1	2	3	4	5	6	7	30	8	9	10	11	34	12	13	14	37	15	16	17	18	41	19	20	43	21	22	23	45	44	42	40	39	38	36	35	33	32	31	29	28	27	26	25	24
Dy:	1	1	1	1	1	1	1	2	1	1	1	1	2	1	1	1	2	1	1	1	1	2	1	1	2	1	1	1	2	3	5	7	8	9	11	12	14	15	16	18	19	20	21	22	23
ND:	1	2	3	4	5	7	7	6	7	8	10	10	9	10	12	12	11	12	13	15	15	14	16	16	15	16	17	17	16	15	14	13	12	11	10	9	8	7	6	5	4	3	2	1	0
TL:	0	0	0	0	0	0	0	0	0	0	0	0	0	0	0	0	0	0	0	0	0	0	0	0	0	0	0	0	0	0	0	0	0	0	0	0	0	0	0	0	0	0	0	0	0
RR?:	-	-	-	-	-	-	-	-	-	-	-	-	-	-	-	-	-	-	-	-	-	-	-	-	-	-	-	-	-	-	-	-	-	-	-	-	-	-	-	-	-	-	-	-	-
Delta1:	0	0	0	0	0	0	0	0	0	0	0	0	0	0	0	0	0	0	0	0	0	0	0	0	0	0	0	0	0	0	0	0	0	0	-1.17572	1.49418	-1.22716	1.46832	0.0689929	-1.26556	1.44788	0.0540672	0.0512933	0.0487902	0.04652
P_Delta1:	1	1	1	1	1	1	1	1	1	1	1	1	1	1	1	1	1	1	1	1	1	1	1	1	1	1	1	1	1	1	1	1	1	1	0.79619	0.145455	0.826984	0.120879	0.463797	0.859716	0.125817	0.470503	0.457127	0.457402	0.461957
Delta2:	0	0	0	0	0	0	0	0	0	0	0	0	0	0	0	0	0	0	0	0	0	0	0	0	0	0	0	0	0	0	0	0	0	0	0.246564	1.38629	0.246564	1.38629	0.693147	0.246564	1.38629	0.693147	0.693147	0.693147	0.693147
P_Delta2:	1	1	1	1	1	1	1	1	1	1	1	1	1	1	1	1	1	1	1	1	1	1	1	1	1	1	1	1	1	1	1	1	1	1	0.378571	0.145455	0.389122	0.120879	0.247863	0.386598	0.111928	0.23839	0.230719	0.228938	0.246039
SGPr:	1	1	1	1	1	1	1	1	1	1	1	1	1	1	1	1	1	1	1	1	1	1	1	1	1	1	1	1	1	1	1	1	1	1	0.4	0.181818	0.307692	0.142857	0.133333	0.235294	0.111111	0.105263	0.1	0.0952381	0.0909091
P_dSGP:	1	1	1	1	1	1	1	1	1	1	1	1	1	1	1	1	1	1	1	1	1	1	1	1	1	1	1	1	1	1	1	1	1	1	0.71619	0.28153	0.656765	0.363836	0.551002	0.65047	0.421606	0.525732	0.529784	0.512572	0.513911
RR?: * Denotes nodes for which random resolutions were performed due to a polytomy at the first nested node in the larger descendant
	** Denotes nodes for which random resolutions were performed due to a polytomy at that node.
************************** end general information **************************
************* WHOLE-TREE TESTS OF DIVERSIFICATION RATE VARIATION *************
stat:	Mr	Ic/PrIc	sumlnP*/Mp*	PNP/Mp	sumP*/Ms*	SNP/Ms	B1/PrB1
Min ERM	3.08911e-07	155	-1.29924	3.81837e-09	0.421751	12.9823	8.11273
Max ERM	1	10	0	1	1	22	15
Observed	1.19496e-06	181	-1.49418	4.83614e-11	0.327958	11.1059	8.38073
--> TailPr		0	0	0	0	0	4e-05
*********** end whole-tree tests of diversification rate variation ***********
******************* SHIFT STATISTICS FOR INDIVIDUAL NODES *******************
***************** end shift statistics for individual nodes *****************
******* TREE #2 *******
**************************** GENERAL INFORMATION ****************************
Sat Oct 29 21:31:43 2011
Tree from file: Chasmosaurines_DIVA.nex
-------------------------------- SETTINGS --------------------------------
Numbers as:	taxon labels
Number of simulated trees:	100000
--------------------------------------------------------------------------
Number of taxa:	23
Tree:	(22,(23,(21,(20,(1,((2,3),(4,(5,((6,7),(8,((9,10),(11,(12,((14,13),((15,16),(17,(18,19)))))))))))))))))
Node:	0	1	2	3	4	5	6	7	8	9	10	11	12	13	14	15	16	17	18	19	20	21	22	23	24	25	26	27	28	29	30	31	32	33	34	35	36	37	38	39	40	41	42	43	44
Paup#:	1	2	3	4	5	6	7	30	8	9	10	11	34	12	13	14	37	15	16	17	18	41	19	20	43	21	22	23	45	44	42	40	39	38	36	35	33	32	31	29	28	27	26	25	24
Dy:	1	1	1	1	1	1	1	2	1	1	1	1	2	1	1	1	2	1	1	1	1	2	1	1	2	1	1	1	2	3	5	7	8	9	11	12	14	15	16	18	19	20	21	22	23
ND:	1	2	3	4	5	7	7	6	7	8	10	10	9	10	12	12	11	12	13	15	15	14	16	16	15	16	17	17	16	15	14	13	12	11	10	9	8	7	6	5	4	3	2	1	0
TL:	0	0	0	0	0	0	0	0	0	0	0	0	0	0	0	0	0	0	0	0	0	0	0	0	0	0	0	0	0	0	0	0	0	0	0	0	0	0	0	0	0	0	0	0	0
RR?:	-	-	-	-	-	-	-	-	-	-	-	-	-	-	-	-	-	-	-	-	-	-	-	-	-	-	-	-	-	-	-	-	-	-	-	-	-	-	-	-	-	-	-	-	-
Delta1:	0	0	0	0	0	0	0	0	0	0	0	0	0	0	0	0	0	0	0	0	0	0	0	0	0	0	0	0	0	0	0	0	0	0	-1.17572	1.49418	-1.22716	1.46832	0.0689929	-1.26556	1.44788	0.0540672	0.0512933	0.0487902	0.04652
P_Delta1:	1	1	1	1	1	1	1	1	1	1	1	1	1	1	1	1	1	1	1	1	1	1	1	1	1	1	1	1	1	1	1	1	1	1	0.79619	0.145455	0.826984	0.120879	0.463797	0.859716	0.125817	0.470503	0.457127	0.457402	0.461957
Delta2:	0	0	0	0	0	0	0	0	0	0	0	0	0	0	0	0	0	0	0	0	0	0	0	0	0	0	0	0	0	0	0	0	0	0	0.246564	1.38629	0.246564	1.38629	0.693147	0.246564	1.38629	0.693147	0.693147	0.693147	0.693147
P_Delta2:	1	1	1	1	1	1	1	1	1	1	1	1	1	1	1	1	1	1	1	1	1	1	1	1	1	1	1	1	1	1	1	1	1	1	0.378571	0.145455	0.389122	0.120879	0.247863	0.386598	0.111928	0.23839	0.230719	0.228938	0.246039
SGPr:	1	1	1	1	1	1	1	1	1	1	1	1	1	1	1	1	1	1	1	1	1	1	1	1	1	1	1	1	1	1	1	1	1	1	0.4	0.181818	0.307692	0.142857	0.133333	0.235294	0.111111	0.105263	0.1	0.0952381	0.0909091
P_dSGP:	1	1	1	1	1	1	1	1	1	1	1	1	1	1	1	1	1	1	1	1	1	1	1	1	1	1	1	1	1	1	1	1	1	1	0.71619	0.28153	0.656765	0.363836	0.551002	0.65047	0.421606	0.525732	0.529784	0.512572	0.513911
RR?: * Denotes nodes for which random resolutions were performed due to a polytomy at the first nested node in the larger descendant
	** Denotes nodes for which random resolutions were performed due to a polytomy at that node.
************************** end general information **************************
************* WHOLE-TREE TESTS OF DIVERSIFICATION RATE VARIATION *************
stat:	Mr	Ic/PrIc	sumlnP*/Mp*	PNP/Mp	sumP*/Ms*	SNP/Ms	B1/PrB1
Min ERM	3.08911e-07	155	-1.29924	3.81837e-09	0.421751	12.9823	8.11273
Max ERM	1	10	0	1	1	22	15
Observed	1.19496e-06	181	-1.49418	4.83614e-11	0.327958	11.1059	8.38073
--> TailPr		0	0	0	0	0	4e-05
*********** end whole-tree tests of diversification rate variation ***********
******************* SHIFT STATISTICS FOR INDIVIDUAL NODES *******************
***************** end shift statistics for individual nodes *****************
**************************** OUTPUT FOR WHOLE BATCH ****************************
-------------------------------- SETTINGS --------------------------------
Numbers as:	taxon labels
Number of simulated trees:	100000
--------------------------------------------------------------------------
Number of taxa:	23
stat:	Mr	Ic/PrIc	sumlnP*/Mp*	PNP/Mp	sumP*/Ms*	SNP/Ms	B1/PrB1
Min ERM	3.08911e-07	155	-1.29924	3.81837e-09	0.421751	12.9823	8.11273
Max ERM	1	10	0	1	1	22	15
Min sym	1.19496e-06	181	-1.49418	4.83614e-11	0.327958	11.1059	8.38073
--> TailPr		0	0	0	0	0	4e-05
Max sym	1.19496e-06	181	-1.49418	4.83614e-11	0.327958	11.1059	8.38073
--> TailPr		0	0	0	0	0	4e-05
********************************* END OF BATCH *********************************
